# Supplementary material for: High PTEN gene expression is a negative prognostic marker in human primary breast cancers with preserved p53 function
Source: Springer Nature journal article supplement (doi:10.1007/s10549-017-4160-5), 2017-02-17
Supplement: MOESM2 [file 12075630]

**High *PTEN* gene expression is a negative prognostic marker in human primary breast cancers with preserved p53 function**

**Breast Cancer Research and Treatment**

**Authors:**

Synnøve Yndestad<sup>1,2</sup>, Eilin Austreid<sup>1</sup>, Stian Knappskog<sup>1,2</sup>, Ranjan Chrisanthar<sup>3</sup>, Peer Kåre Lilleng<sup>4,5</sup>, Per Eystein Lønning<sup>1,2</sup>, Hans Petter Eikesdal<sup>1,2\*</sup>

**Author details:**

<sup>1</sup>Section of Oncology, Department of Clinical Science, University of Bergen, Bergen, Norway.

<sup>2</sup>Department of Oncology, Haukeland University Hospital, Bergen, Norway.

<sup>3</sup>Section of Molecular Pathology, Department of Pathology, Oslo University Hospital, Oslo, Norway.

<sup>4</sup>Department of Pathology, Haukeland University Hospital, Bergen, Norway.

<sup>5</sup>Laboratory of Pathology, Department of Clinical Medicine, University of Bergen, Bergen, Norway.

\***Correspondence:** [hans.eikesdal@k2.uib.no](mailto:hans.eikesdal@k2.uib.no)

**Online Resource 2.**

|                    | Score | All samples |     | ER+ |     | ER- |     | TNBC |     | TP53 wt |     | TP53 mut |     | PIK3CA wt |     | PIK3CA mut |     |
|--------------------|-------|-------------|-----|-----|-----|-----|-----|------|-----|---------|-----|----------|-----|-----------|-----|------------|-----|
|                    |       | n           | %   | n   | %   | n   | %   | n    | %   | n       | %   | n        | %   | n         | %   | n          | %   |
| PTEN (c+n)*        | 0     | 55          | 29  | 23  | 22  | 32  | 40  | 13   | 36  | 31      | 23  | 18       | 49  | 43        | 32  | 6          | 17  |
|                    | 0.5   | 20          | 11  | 9   | 9   | 11  | 14  | 7    | 19  | 15      | 11  | 4        | 11  | 15        | 11  | 4          | 11  |
|                    | 1     | 38          | 20  | 19  | 18  | 18  | 22  | 7    | 19  | 30      | 22  | 6        | 16  | 30        | 22  | 6          | 17  |
|                    | 1.5   | 48          | 26  | 33  | 32  | 14  | 17  | 6    | 17  | 40      | 30  | 5        | 14  | 31        | 23  | 14         | 39  |
|                    | 2     | 17          | 9   | 13  | 13  | 4   | 5   | 1    | 3   | 13      | 10  | 3        | 8   | 11        | 8   | 5          | 14  |
|                    | 2.5   | 5           | 3   | 4   | 4   | 1   | 1   | 1    | 3   | 4       | 3   | 0        | 0   | 4         | 3   | 0          | 0   |
|                    | 3     | 4           | 2   | 3   | 3   | 1   | 1   | 1    | 3   | 1       | 1   | 1        | 3   | 1         | 1   | 1          | 3   |
| Total              | 187   | 100         | 104 | 100 | 81  | 100 | 36  | 100  | 134 | 100     | 37  | 100      | 135 | 100       | 36  | 100        |     |
| PTEN (c)           | 0     | 64          | 34  | 29  | 28  | 35  | 43  | 14   | 39  | 40      | 30  | 18       | 49  | 50        | 37  | 8          | 22  |
|                    | 1     | 88          | 47  | 52  | 50  | 34  | 42  | 17   | 47  | 72      | 54  | 10       | 27  | 63        | 47  | 19         | 53  |
|                    | 2     | 30          | 16  | 20  | 19  | 10  | 12  | 4    | 11  | 21      | 16  | 7        | 19  | 21        | 16  | 7          | 19  |
|                    | 3     | 5           | 3   | 3   | 3   | 2   | 2   | 1    | 3   | 1       | 1   | 2        | 5   | 1         | 1   | 2          | 6   |
|                    | Total | 187         | 100 | 104 | 100 | 81  | 100 | 36   | 100 | 134     | 100 | 37       | 100 | 135       | 100 | 36         | 100 |
| PTEN (n)           | 0     | 76          | 41  | 30  | 29  | 46  | 57  | 21   | 58  | 44      | 33  | 25       | 68  | 58        | 43  | 11         | 31  |
|                    | 1     | 40          | 21  | 22  | 21  | 17  | 21  | 6    | 17  | 31      | 23  | 7        | 19  | 30        | 22  | 8          | 22  |
|                    | 2     | 59          | 32  | 43  | 41  | 15  | 19  | 7    | 19  | 52      | 39  | 3        | 8   | 41        | 30  | 14         | 39  |
|                    | 3     | 12          | 6   | 9   | 9   | 3   | 4   | 2    | 6   | 7       | 5   | 2        | 5   | 6         | 4   | 3          | 8   |
|                    | Total | 187         | 100 | 104 | 100 | 81  | 100 | 36   | 100 | 134     | 100 | 37       | 100 | 135       | 100 | 36         | 100 |
| pAkt (Ser473) (n)  | 0     | 96          | 52  | 49  | 47  | 46  | 58  | 21   | 60  | 67      | 50  | 21       | 57  | 77        | 58  | 11         | 29  |
|                    | 1     | 50          | 27  | 30  | 29  | 19  | 24  | 10   | 29  | 36      | 27  | 10       | 27  | 34        | 26  | 12         | 32  |
|                    | 2     | 36          | 19  | 23  | 22  | 13  | 16  | 4    | 11  | 28      | 21  | 5        | 14  | 20        | 15  | 13         | 34  |
|                    | 3     | 4           | 2   | 2   | 2   | 2   | 3   | 0    | 0   | 2       | 2   | 1        | 3   | 1         | 1   | 2          | 5   |
|                    | Total | 186         | 100 | 104 | 100 | 80  | 100 | 35   | 100 | 133     | 100 | 37       | 100 | 132       | 100 | 38         | 100 |
| pS6K (Ser371) (n)  | 0     | 49          | 27  | 12  | 12  | 36  | 44  | 18   | 50  | 30      | 23  | 16       | 43  | 35        | 27  | 11         | 32  |
|                    | 1     | 53          | 29  | 25  | 26  | 27  | 33  | 12   | 33  | 40      | 31  | 9        | 24  | 41        | 31  | 8          | 24  |
|                    | 2     | 76          | 42  | 58  | 59  | 18  | 22  | 6    | 17  | 56      | 44  | 12       | 32  | 54        | 41  | 14         | 41  |
|                    | 3     | 3           | 2   | 3   | 3   | 0   | 0   | 0    | 0   | 2       | 2   | 0        | 0   | 1         | 1   | 1          | 3   |
|                    | Total | 181         | 100 | 98  | 100 | 81  | 100 | 36   | 100 | 128     | 100 | 37       | 100 | 131       | 100 | 34         | 100 |
| pS6K (Thr389) (n)  | 0     | 177         | 93  | 94  | 88  | 81  | 99  | 35   | 97  | 128     | 93  | 34       | 92  | 125       | 93  | 37         | 95  |
|                    | 1     | 9           | 5   | 9   | 8   | 0   | 0   | 0    | 0   | 5       | 4   | 3        | 8   | 6         | 4   | 2          | 5   |
|                    | 2     | 5           | 3   | 4   | 4   | 1   | 1   | 1    | 3   | 4       | 3   | 0        | 0   | 4         | 3   | 0          | 0   |
|                    | 3     | 0           | 0   | 0   | 0   | 0   | 0   | 0    | 0   | 0       | 0   | 0        | 0   | 0         | 0   | 0          | 0   |
|                    | Total | 191         | 100 | 107 | 100 | 82  | 100 | 36   | 100 | 137     | 100 | 37       | 100 | 135       | 100 | 39         | 100 |
| p4EBP1 (Thr70) (c) | 0     | 14          | 8   | 6   | 6   | 8   | 10  | 5    | 14  | 11      | 8   | 2        | 5   | 10        | 8   | 3          | 8   |
|                    | 1     | 70          | 38  | 44  | 44  | 24  | 30  | 8    | 22  | 52      | 40  | 10       | 27  | 44        | 34  | 18         | 49  |
|                    | 2     | 83          | 45  | 41  | 41  | 42  | 52  | 21   | 58  | 56      | 43  | 22       | 59  | 63        | 48  | 15         | 41  |
|                    | 3     | 16          | 9   | 9   | 9   | 7   | 9   | 2    | 6   | 11      | 8   | 3        | 8   | 13        | 10  | 1          | 3   |
|                    | Total | 183         | 100 | 100 | 100 | 81  | 100 | 36   | 100 | 130     | 100 | 37       | 100 | 130       | 100 | 37         | 100 |

Immunohistochemistry results for PTEN and phosphorylated Akt (pAkt, Ser473), S6K (pS6K, Ser371 or Thr389) and 4EBP1 (p4EBP1, Thr70) proteins. Staining was performed on tissue microarray sections of pretreatment breast cancer samples from Study 3, and results are summarized for all samples, or subgrouped based on estrogen receptor (ER) status, triple negative breast cancer status (TNBC);

ER/PGR/HER2 negative breast cancer), *TP53* or *PIK3CA* mutation status. (c) = cytoplasmic staining. (n) = nuclear staining. \*PTEN (c+n) score is given as (c+n)/2.
