# Supplementary material for: High PTEN gene expression is a negative prognostic marker in human primary breast cancers with preserved p53 function
Source: Springer Nature journal article supplement (doi:10.1007/s10549-017-4160-5), 2017-02-17

**High *PTEN* gene expression is a negative prognostic marker in human primary breast cancers with preserved p53 function**

**Breast Cancer Research and Treatment**

**Authors:**

Synnøve Yndestad<sup>1,2</sup>, Eilin Austreid<sup>1</sup>, Stian Knappskog<sup>1,2</sup>, Ranjan Chrisanthar<sup>3</sup>, Peer Kåre Lilleng<sup>4,5</sup>, Per Eystein Lønning<sup>1,2</sup>, Hans Petter Eikesdal<sup>1,2\*</sup>

**Author details:**

<sup>1</sup>Section of Oncology, Department of Clinical Science, University of Bergen, Bergen, Norway.

<sup>2</sup>Department of Oncology, Haukeland University Hospital, Bergen, Norway.

<sup>3</sup>Section of Molecular Pathology, Department of Pathology, Oslo University Hospital, Oslo, Norway.

<sup>4</sup>Department of Pathology, Haukeland University Hospital, Bergen, Norway.

<sup>5</sup>Laboratory of Pathology, Department of Clinical Medicine, University of Bergen, Bergen, Norway.

**\*Correspondence:** [hans.eikesdal@k2.uib.no](mailto:hans.eikesdal@k2.uib.no)

### Online Resource 3

**a-b** Forest plot for the association between tumor *PTEN* gene expression level and recurrence-free (**a**) or disease-free survival (**b**) in patients with locally advanced breast cancer. Results are presented as individual hazard ratios (HRs) with corresponding 95% confidence intervals (CIs) for Study 1 (doxorubicin trial), Study 2 (FUMI trial) and Study 3 (epirubicin/paclitaxel trial) combined (i.e. all cohorts) or split by subgroups.  $HR > 1$  indicates that the survival of patients with tumor *PTEN* gene expression above the median (*PTEN* high) is shorter than that of patients with *PTEN* low tumors, while  $HR < 1$  indicates the opposite. RFS: recurrence-free survival, DSS: disease-specific survival, wt: wildtype, mut: mutated, ER: estrogen receptor, PGR: progesterone receptor, TNBC: triple negative breast cancer (ER/PGR/HER2 negative breast cancer), \*for patients in Study 1 and 2 PGR status was not available, and TNBC was defined as ER/HER2 negative tumors

**a**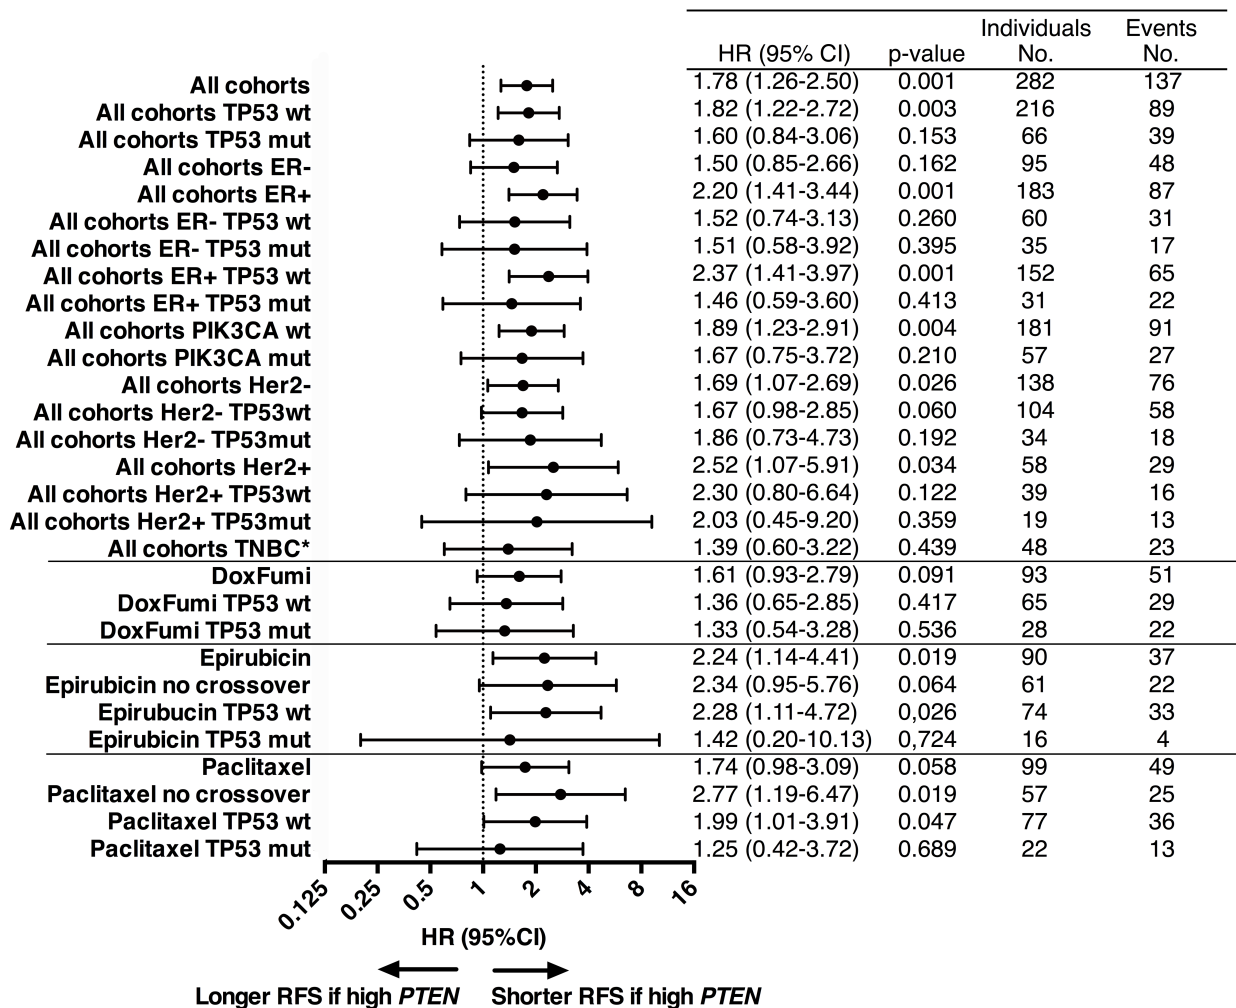**b**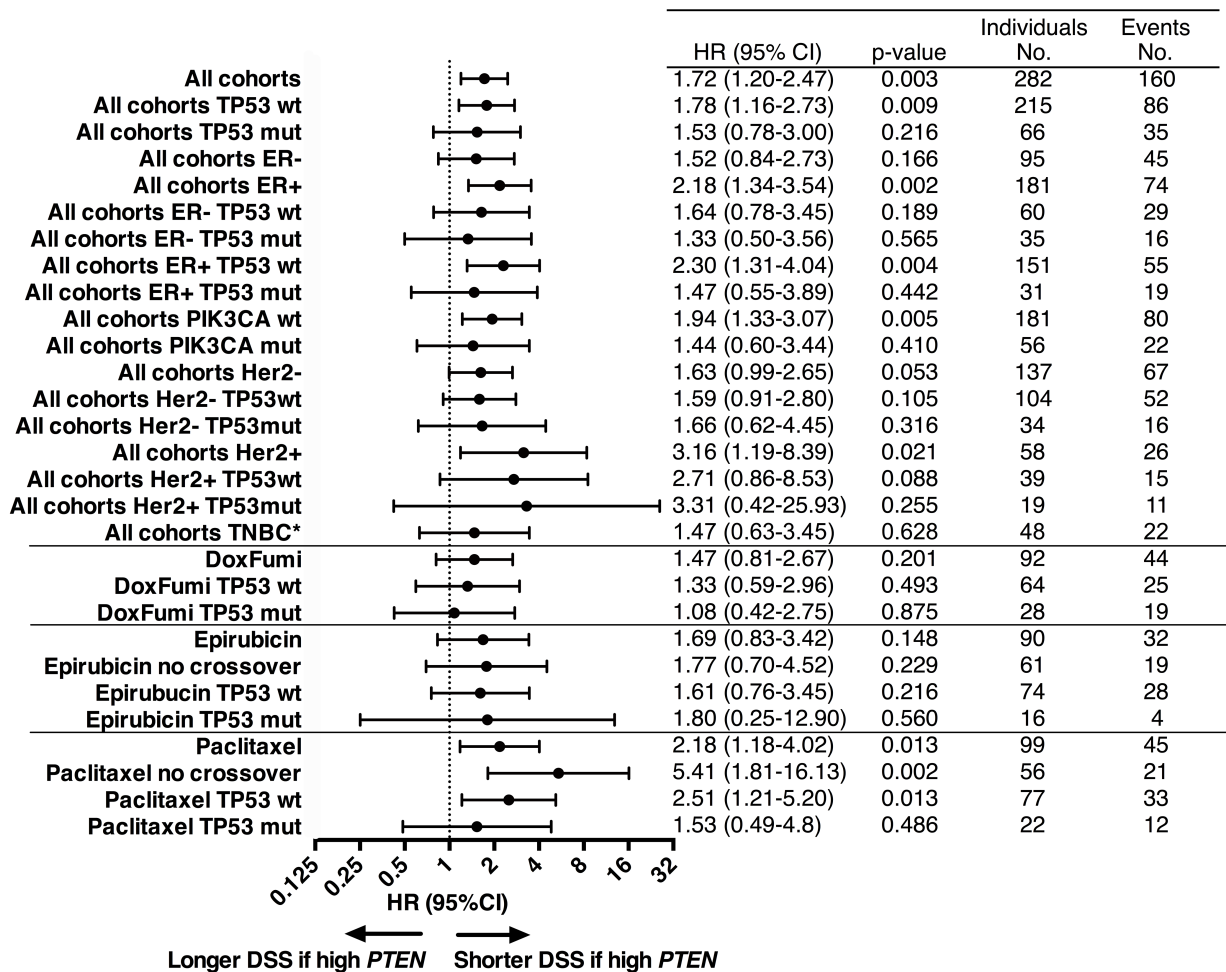

Supplement: MOESM3 [file 12075630]
