# Supplementary material for: High PTEN gene expression is a negative prognostic marker in human primary breast cancers with preserved p53 function
Source: Springer Nature journal article supplement (doi:10.1007/s10549-017-4160-5), 2017-02-17

**High *PTEN* gene expression is a negative prognostic marker in human primary breast cancers with preserved p53 function**

**Breast Cancer Research and Treatment**

**Authors:**

Synnøve Yndestad<sup>1,2</sup>, Eilin Austreid<sup>1</sup>, Stian Knappskog<sup>1,2</sup>, Ranjan Chrisanthar<sup>3</sup>, Peer Kåre Lilleng<sup>4,5</sup>, Per Eystein Lønning<sup>1,2</sup>, Hans Petter Eikesdal<sup>1,2\*</sup>

**Author details:**

<sup>1</sup>Section of Oncology, Department of Clinical Science, University of Bergen, Bergen, Norway.

<sup>2</sup>Department of Oncology, Haukeland University Hospital, Bergen, Norway.

<sup>3</sup>Section of Molecular Pathology, Department of Pathology, Oslo University Hospital, Oslo, Norway.

<sup>4</sup>Department of Pathology, Haukeland University Hospital, Bergen, Norway.

<sup>5</sup>Laboratory of Pathology, Department of Clinical Medicine, University of Bergen, Bergen, Norway.

**\*Correspondence:** [hans.eikesdal@k2.uib.no](mailto:hans.eikesdal@k2.uib.no)

## Online Resource 5

**a-b** Forest plot for the association between tumor protein staining by immunohistochemistry (IHC) and recurrence-free (**a**) or disease-free survival (**b**) in patients with locally advanced breast cancer. Results are presented as individual hazard ratios (HRs) with corresponding 95% confidence intervals (CIs), based on tissue microarray staining and survival data from Study 3 (epirubicin/paclitaxel trial).  $HR > 1$  indicates that the survival of patients with protein staining is shorter than that of patients without protein staining in the tumors, while  $HR < 1$  indicates the opposite. Number of samples analyzed per protein vary due to technical issues during tissue microarray staining. \*One case censored before the earliest event in a stratum. RFS: recurrence-free survival, DSS: disease-specific survival, wt: wildtype, mut: mutated, ER: estrogen receptor, pAkt: phosphorylated Akt (Ser 473), pS6K (Ser 371): phosphorylated S6 kinase (Ser 371), pS6K (Thr 389): phosphorylated S6 kinase (Thr 389), p4EBP1: phosphorylated 4EBP1 (Thr 70), c: cytoplasmic staining, n: nuclear staining

**a**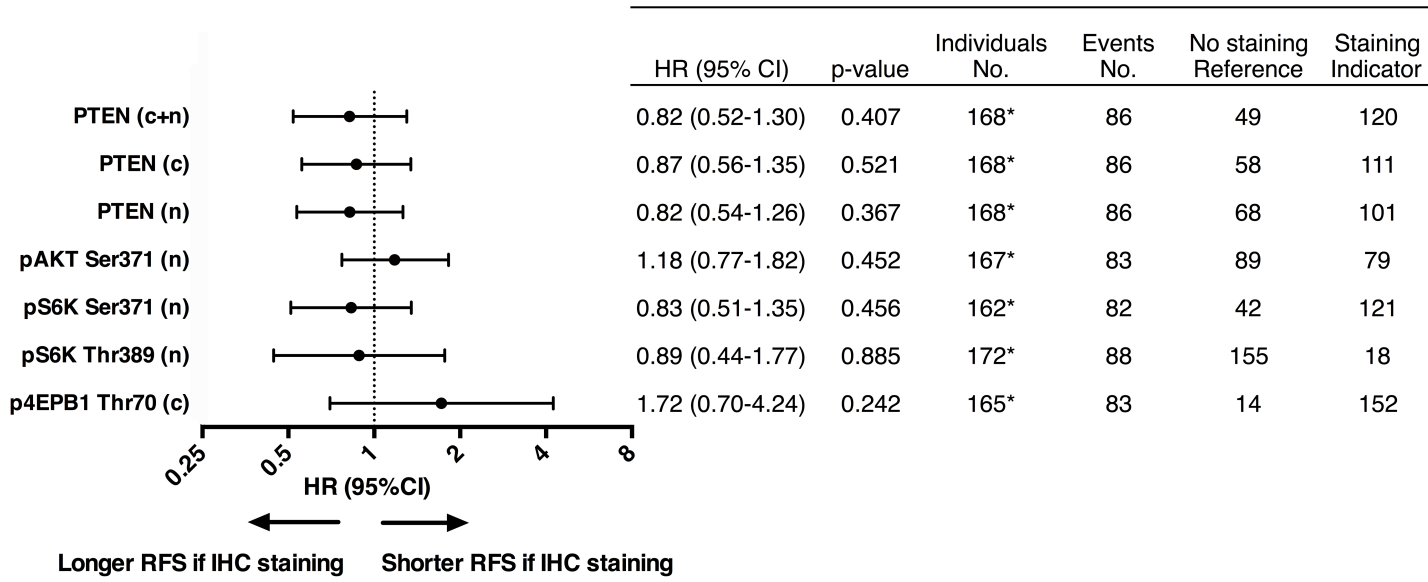**b**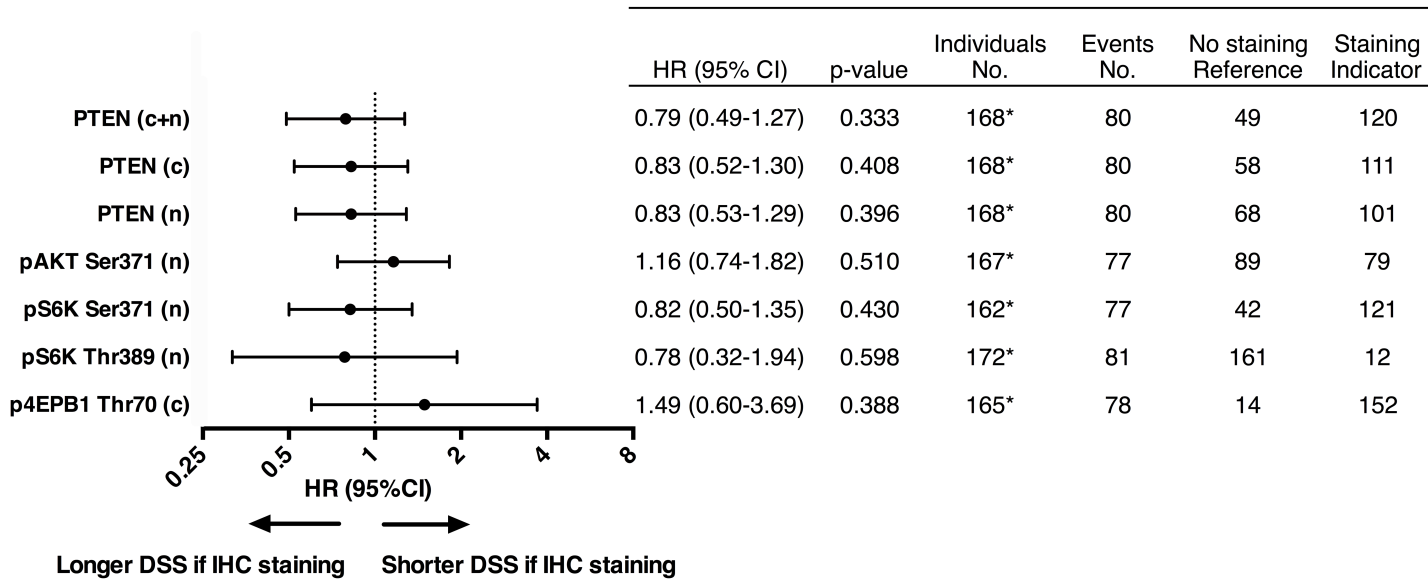

Supplement: MOESM5 [file 12075630]
